# Supplementary material
Source: MDPI journal article supplement (https://www.mdpi.com/2075-163X/12/5/587)
Supplement: s1 [file s1]

**Table S3.** In situ Sr and Nd isotopic compositions of apatite grains in the Shaxiongdong carbonatite.

| Sample           | $^{87}\text{Rb}/^{86}\text{Sr}$ | $^{87}\text{Sr}/^{86}\text{Sr}$ | $(^{87}\text{Sr}/^{86}\text{Sr})_{220 \text{ Ma}}$ | $^{147}\text{Sm}/^{144}\text{Nd}$ | $^{143}\text{Nd}/^{144}\text{Nd}$ | $\epsilon_{\text{Nd}}(220 \text{ Ma})$ | TDM(Ma) |
|------------------|---------------------------------|---------------------------------|----------------------------------------------------|-----------------------------------|-----------------------------------|----------------------------------------|---------|
| <b>SXD15-02</b>  |                                 |                                 |                                                    |                                   |                                   |                                        |         |
| 02-01            | 0.00003                         | 0.70310                         | 0.70310                                            | 0.10398                           | 0.51262                           | 2.3                                    | 737     |
| 02-02            | 0.00001                         | 0.70302                         | 0.70302                                            | 0.10611                           | 0.51268                           | 3.4                                    | 667     |
| 02-03            | 0.00000                         | 0.70307                         | 0.70307                                            | 0.09979                           | 0.51261                           | 2.2                                    | 723     |
| 02-04            | 0.00002                         | 0.70308                         | 0.70308                                            | 0.10996                           | 0.51261                           | 1.9                                    | 794     |
| 02-05            | 0.00001                         | 0.70315                         | 0.70315                                            | 0.10630                           | 0.51261                           | 2                                      | 767     |
| 02-06            | 0.00002                         | 0.70314                         | 0.70314                                            | 0.12132                           | 0.51268                           | 2.9                                    | 776     |
| 02-07            | 0.00001                         | 0.70302                         | 0.70302                                            | 0.13743                           | 0.51262                           | 1.3                                    | 1059    |
| 02-08            | 0.00001                         | 0.70313                         | 0.70313                                            | 0.11777                           | 0.51264                           | 2.3                                    | 811     |
| 02-09            | 0.00003                         | 0.70305                         | 0.70305                                            | 0.09820                           | 0.51256                           | 1.2                                    | 779     |
| 02-10            | 0.00001                         | 0.70302                         | 0.70302                                            | 0.11017                           | 0.51263                           | 2.3                                    | 766     |
| 02-11            | 0.00001                         | 0.70313                         | 0.70313                                            | 0.11462                           | 0.51260                           | 1.6                                    | 846     |
| 02-12            | 0.00001                         | 0.70319                         | 0.70319                                            | 0.11009                           | 0.51257                           | 1.1                                    | 854     |
| 02-13            | 0.00002                         | 0.70311                         | 0.70311                                            | 0.11035                           | 0.51262                           | 2.1                                    | 782     |
| 02-14            | 0.00003                         | 0.70306                         | 0.70306                                            | 0.11373                           | 0.51261                           | 1.8                                    | 824     |
| 02-15            | 0.00002                         | 0.70307                         | 0.70307                                            | 0.10546                           | 0.51259                           | 1.6                                    | 789     |
| 02-16            | 0.00001                         | 0.70305                         | 0.70305                                            | 0.10354                           | 0.51260                           | 1.9                                    | 762     |
| 02-17            | 0.00002                         | 0.70311                         | 0.70311                                            | 0.11860                           | 0.51266                           | 2.6                                    | 786     |
| 02-18            | 0.00001                         | 0.70304                         | 0.70304                                            | 0.09799                           | 0.51262                           | 2.4                                    | 699     |
| 02-19            | 0.00002                         | 0.70305                         | 0.70305                                            | 0.10322                           | 0.51263                           | 2.5                                    | 718     |
| 02-20            | 0.00002                         | 0.70297                         | 0.70297                                            | 0.10800                           | 0.51263                           | 2.3                                    | 750     |
| <b>SXD15-04B</b> |                                 |                                 |                                                    |                                   |                                   |                                        |         |
| 04B-01           | 0.00001                         | 0.70317                         | 0.70317                                            | 0.10678                           | 0.51261                           | 2                                      | 770     |

|                 |         |         |         |         |         |     |      |
|-----------------|---------|---------|---------|---------|---------|-----|------|
| 04B-02          | 0.00002 | 0.70318 | 0.70318 | 0.13587 | 0.51265 | 1.9 | 979  |
| 04B-03          | 0.00001 | 0.70323 | 0.70323 | 0.13167 | 0.51263 | 1.7 | 966  |
| 04B-04          | 0.00001 | 0.70313 | 0.70313 | 0.13274 | 0.51261 | 1.3 | 1016 |
| 04B-05          | 0.00001 | 0.70328 | 0.70328 | 0.11902 | 0.51262 | 1.8 | 854  |
| 04B-06          | 0.00002 | 0.70320 | 0.70320 | 0.13660 | 0.51265 | 1.9 | 988  |
| 04B-07          | 0.00003 | 0.70213 | 0.70213 | 0.13659 | 0.51269 | 2.7 | 909  |
| 04B-08          | 0.00001 | 0.70202 | 0.70202 | 0.12687 | 0.51265 | 2.2 | 878  |
| 04B-10          | 0.00000 | 0.70206 | 0.70206 | 0.12784 | 0.51264 | 2   | 906  |
| 04B-11          | 0.00001 | 0.70319 | 0.70319 | 0.13157 | 0.51268 | 2.7 | 873  |
| 04B-12          | 0.00001 | 0.70318 | 0.70318 | 0.14083 | 0.51263 | 1.4 | 1087 |
| 04B-13          | 0.00000 | 0.70304 | 0.70304 | 0.13820 | 0.51265 | 1.9 | 1009 |
| 04B-14          | 0.00001 | 0.70308 | 0.70308 | 0.13444 | 0.51263 | 1.6 | 1000 |
| 04B-15          | 0.00002 | 0.70316 | 0.70316 | 0.13411 | 0.51265 | 2   | 958  |
| 04B-16          | 0.00001 | 0.70313 | 0.70313 | 0.13413 | 0.51263 | 1.6 | 996  |
| 04B-17          | 0.00002 | 0.70321 | 0.70321 | 0.14379 | 0.51264 | 1.5 | 1111 |
| 04B-18          | 0.00002 | 0.70319 | 0.70319 | 0.13821 | 0.51264 | 1.7 | 1030 |
| 04B-19          | 0.00002 | 0.70332 | 0.70332 | 0.13432 | 0.51266 | 2.2 | 941  |
| 04B-20          | 0.00002 | 0.70317 | 0.70317 | 0.12840 | 0.51262 | 1.6 | 947  |
| <hr/>           |         |         |         |         |         |     |      |
| <b>SXD15-09</b> |         |         |         |         |         |     |      |
| 09-1            | 0.00001 | 0.70301 | 0.70301 | 0.13615 | 0.51265 | 1.9 | 983  |
| 09-2            | 0.00001 | 0.70307 | 0.70307 | 0.16285 | 0.51267 | 1.6 | 1437 |
| 09-3            | 0.00001 | 0.70297 | 0.70297 | 0.12494 | 0.51263 | 1.9 | 893  |
| 09-4            | 0.00002 | 0.70298 | 0.70298 | 0.13280 | 0.51263 | 1.6 | 980  |
| 09-5            | 0.00001 | 0.70298 | 0.70298 | 0.15010 | 0.51260 | 0.6 | 1317 |
| 09-6            | 0.00002 | 0.70304 | 0.70304 | 0.15805 | 0.51268 | 1.9 | 1286 |
| 09-7            | 0.00001 | 0.70300 | 0.70300 | 0.12827 | 0.51264 | 2   | 910  |

|                 |         |         |         |         |         |     |      |
|-----------------|---------|---------|---------|---------|---------|-----|------|
| 09-8            | 0.00001 | 0.70304 | 0.70304 | 0.13683 | 0.51267 | 2.3 | 952  |
| 09-9            | 0.00001 | 0.70298 | 0.70298 | 0.14291 | 0.51264 | 1.6 | 1098 |
| 09-10           | 0.00001 | 0.70299 | 0.70299 | 0.14228 | 0.51265 | 1.8 | 1067 |
| 09-11           | 0.00002 | 0.70296 | 0.70296 | 0.14312 | 0.51262 | 1.2 | 1144 |
| 09-12           | 0.00002 | 0.70304 | 0.70304 | 0.14619 | 0.51261 | 0.9 | 1218 |
| 09-13           | 0.00001 | 0.70300 | 0.70300 | 0.12895 | 0.51260 | 1.2 | 989  |
| 09-14           | 0.00002 | 0.70303 | 0.70303 | 0.13206 | 0.51260 | 1.1 | 1027 |
| 09-15           | 0.00002 | 0.70305 | 0.70305 | 0.13721 | 0.51263 | 1.5 | 1036 |
| 09-16           | 0.00001 | 0.70302 | 0.70302 | 0.14736 | 0.51266 | 1.8 | 1125 |
| 09-17           | 0.00001 | 0.70305 | 0.70305 | 0.13126 | 0.51262 | 1.5 | 980  |
| 09-18           | 0.00001 | 0.70308 | 0.70308 | 0.13614 | 0.51264 | 1.7 | 1002 |
| <hr/>           |         |         |         |         |         |     |      |
| <b>SXD15-26</b> |         |         |         |         |         |     |      |
| 26-01           | 0.00003 | 0.70299 | 0.70299 | 0.12955 | 0.51264 | 1.9 | 924  |
| 26-02           | 0.00002 | 0.70294 | 0.70294 | 0.13500 | 0.51269 | 2.7 | 891  |
| 26-03           | 0.00039 | 0.70304 | 0.70303 | 0.14093 | 0.51270 | 2.8 | 943  |
| 26-04           | 0.00002 | 0.70299 | 0.70299 | 0.10142 | 0.51263 | 2.5 | 707  |
| 26-05           | 0.00002 | 0.70300 | 0.70300 | 0.14042 | 0.51267 | 2.2 | 998  |
| 26-06           | 0.00001 | 0.70301 | 0.70301 | 0.10999 | 0.51258 | 1.3 | 838  |
| 26-07           | 0.00002 | 0.70301 | 0.70301 | 0.12154 | 0.51259 | 1.2 | 926  |
| 26-08           | 0.00001 | 0.70298 | 0.70298 | 0.17490 | 0.51271 | 2   | 1724 |
| 26-09           | 0.00002 | 0.70295 | 0.70295 | 0.14463 | 0.51265 | 1.7 | 1103 |
| 26-10           | 0.00001 | 0.70308 | 0.70308 | 0.11724 | 0.51263 | 2.1 | 822  |
| 26-11           | 0.00000 | 0.70302 | 0.70302 | 0.13257 | 0.51266 | 2.2 | 921  |
| 26-12           | 0.00002 | 0.70296 | 0.70296 | 0.11512 | 0.51261 | 1.7 | 835  |
| 26-13           | 0.00002 | 0.70301 | 0.70301 | 0.11945 | 0.51265 | 2.4 | 809  |
| 26-14           | 0.00000 | 0.70295 | 0.70295 | 0.10128 | 0.51260 | 1.9 | 746  |

|       |         |         |         |         |         |     |      |
|-------|---------|---------|---------|---------|---------|-----|------|
| 26-15 | 0.00002 | 0.70300 | 0.70300 | 0.11072 | 0.51262 | 2.1 | 785  |
| 26-16 | 0.00001 | 0.70294 | 0.70294 | 0.11365 | 0.51257 | 1   | 884  |
| 26-17 | 0.00001 | 0.70296 | 0.70296 | 0.12010 | 0.51265 | 2.4 | 815  |
| 26-18 | 0.00001 | 0.70301 | 0.70301 | 0.10903 | 0.51263 | 2.3 | 758  |
| 26-19 | 0.00001 | 0.70298 | 0.70298 | 0.10012 | 0.51258 | 1.6 | 765  |
| 26-20 | 0.00001 | 0.70301 | 0.70301 | 0.14566 | 0.51268 | 2.3 | 1053 |

---

**Table S2.** In situ Sr and Nd isotopic compositions of apatite grains in the Shaxiongdong syenite.

| Sample          | $^{87}\text{Rb}/^{86}\text{Sr}$ | $^{87}\text{Sr}/^{86}\text{Sr}$ | $(^{87}\text{Sr}/^{86}\text{Sr})_{435 \text{ Ma}}$ | $^{147}\text{Sm}/^{144}\text{Nd}$ | $^{143}\text{Nd}/^{144}\text{Nd}$ | $\epsilon_{\text{Nd}}(435 \text{ Ma})$ | TDM(Ma) |
|-----------------|---------------------------------|---------------------------------|----------------------------------------------------|-----------------------------------|-----------------------------------|----------------------------------------|---------|
| <b>SXD15-08</b> |                                 |                                 |                                                    |                                   |                                   |                                        |         |
| 08-01           | 0.00003                         | 0.70312                         | 0.70312                                            | 0.14453                           | 0.51259                           | 1.9                                    | 1237    |
| 08-02           | 0.00004                         | 0.70312                         | 0.70312                                            | 0.13352                           | 0.51263                           | 3.4                                    | 984     |
| 08-03           | 0.00023                         | 0.70318                         | 0.70318                                            | 0.15287                           | 0.51261                           | 2                                      | 1340    |
| 08-04           | 0.00003                         | 0.70315                         | 0.70314                                            | 0.15797                           | 0.51263                           | 2.1                                    | 1409    |
| 08-05           | 0.00003                         | 0.70308                         | 0.70308                                            | 0.14036                           | 0.51263                           | 2.9                                    | 1088    |
| 08-06           | 0.00002                         | 0.70304                         | 0.70304                                            | 0.15914                           | 0.51261                           | 1.6                                    | 1495    |
| 08-07           | 0.00002                         | 0.70316                         | 0.70316                                            | 0.15470                           | 0.51265                           | 2.6                                    | 1290    |
| 08-08           | 0.00001                         | 0.70313                         | 0.70313                                            | 0.14658                           | 0.51267                           | 3.5                                    | 1082    |
| 08-09           | 0.00002                         | 0.70326                         | 0.70326                                            | 0.14184                           | 0.51263                           | 3                                      | 1095    |
| 08-10           | 0.00001                         | 0.70316                         | 0.70316                                            | 0.14859                           | 0.51264                           | 2.6                                    | 1201    |
| 08-11           | 0.00002                         | 0.70301                         | 0.70301                                            | 0.16711                           | 0.51267                           | 2.2                                    | 1577    |
| 08-12           | 0.00002                         | 0.70317                         | 0.70317                                            | 0.17439                           | 0.51265                           | 1.5                                    | 1927    |
| 08-13           | 0.00002                         | 0.70318                         | 0.70318                                            | 0.15307                           | 0.51268                           | 3.3                                    | 1177    |
| 08-14           | 0.00002                         | 0.70315                         | 0.70315                                            | 0.15982                           | 0.51269                           | 3                                      | 1309    |
| 08-15           | 0.00002                         | 0.70313                         | 0.70313                                            | 0.16401                           | 0.51268                           | 2.6                                    | 1441    |
| 08-16           | 0.00002                         | 0.70313                         | 0.70313                                            | 0.16165                           | 0.51269                           | 2.9                                    | 1353    |
| 08-17           | 0.00003                         | 0.70309                         | 0.70309                                            | 0.14295                           | 0.51267                           | 3.6                                    | 1034    |
| 08-18           | 0.00003                         | 0.70313                         | 0.70313                                            | 0.14526                           | 0.51257                           | 1.5                                    | 1297    |
| <b>SXD15-10</b> |                                 |                                 |                                                    |                                   |                                   |                                        |         |
| 10-01           | 0.00002                         | 0.70323                         | 0.70323                                            | 0.17339                           | 0.51269                           | 2.3                                    | 1737    |
| 10-02           | 0.00002                         | 0.70319                         | 0.70319                                            | 0.16987                           | 0.51273                           | 3.3                                    | 1448    |
| 10-03           | 0.00002                         | 0.70321                         | 0.70321                                            | 0.17246                           | 0.51268                           | 2.2                                    | 1731    |
| 10-04           | 0.00002                         | 0.70327                         | 0.70327                                            | 0.16923                           | 0.51270                           | 2.7                                    | 1551    |

|       |         |         |         |         |         |     |      |
|-------|---------|---------|---------|---------|---------|-----|------|
| 10-05 | 0.00002 | 0.70325 | 0.70325 | 0.17379 | 0.51268 | 2   | 1800 |
| 10-06 | 0.00002 | 0.70332 | 0.70332 | 0.16594 | 0.51267 | 2.3 | 1530 |
| 10-07 | 0.00002 | 0.70328 | 0.70328 | 0.16573 | 0.51265 | 2   | 1575 |
| 10-08 | 0.00002 | 0.70324 | 0.70324 | 0.17005 | 0.51269 | 2.5 | 1607 |
| 10-09 | 0.00003 | 0.70327 | 0.70327 | 0.17512 | 0.51270 | 2.3 | 1790 |
| 10-10 | 0.00002 | 0.70333 | 0.70333 | 0.16864 | 0.51273 | 3.4 | 1409 |
| 10-11 | 0.00002 | 0.70324 | 0.70324 | 0.16962 | 0.51270 | 2.7 | 1558 |
| 10-12 | 0.00002 | 0.70321 | 0.70321 | 0.16318 | 0.51268 | 2.8 | 1402 |
| 10-13 | 0.00002 | 0.70325 | 0.70325 | 0.16824 | 0.51267 | 2.2 | 1602 |
| 10-14 | 0.00002 | 0.70330 | 0.70330 | 0.16998 | 0.51271 | 2.9 | 1527 |
| 10-15 | 0.00003 | 0.70327 | 0.70327 | 0.18047 | 0.51272 | 2.4 | 1987 |
| 10-16 | 0.00002 | 0.70325 | 0.70325 | 0.17342 | 0.51269 | 2.4 | 1722 |
| 10-17 | 0.00003 | 0.70330 | 0.70330 | 0.17404 | 0.51268 | 2.1 | 1801 |
| 10-18 | 0.00002 | 0.70332 | 0.70332 | 0.13731 | 0.51266 | 3.8 | 971  |
| 10-19 | 0.00002 | 0.70323 | 0.70323 | 0.15028 | 0.51267 | 3.1 | 1161 |
| 10-20 | 0.00002 | 0.70326 | 0.70326 | 0.17436 | 0.51268 | 2.1 | 1806 |

---

**Table S3.** In situ Sr and Nd isotopic compositions of apatite grains in the Shaxiongdong hornblendite.

| Sample          | $^{87}\text{Rb}/^{86}\text{Sr}$ | $^{87}\text{Sr}/^{86}\text{Sr}$ | $(^{87}\text{Sr}/^{86}\text{Sr})_{435\text{ Ma}}$ | $^{147}\text{Sm}/^{144}\text{Nd}$ | $^{143}\text{Nd}/^{144}\text{Nd}$ | $\epsilon_{\text{Nd}}(435\text{ Ma})$ | TDM(Ma) |
|-----------------|---------------------------------|---------------------------------|---------------------------------------------------|-----------------------------------|-----------------------------------|---------------------------------------|---------|
| <b>SXD15-21</b> |                                 |                                 |                                                   |                                   |                                   |                                       |         |
| 21-1            | 0.00042                         | 0.70346                         | 0.70345                                           | 0.11486                           | 0.51262                           | 4.3                                   | 812     |
| 21-2            | 0.00366                         | 0.70348                         | 0.70346                                           | 0.12628                           | 0.51269                           | 5                                     | 800     |
| 21-3            | 0.00027                         | 0.70349                         | 0.70349                                           | 0.11847                           | 0.51262                           | 4.1                                   | 841     |
| 21-4            | 0.00028                         | 0.70352                         | 0.70352                                           | 0.14444                           | 0.51267                           | 3.6                                   | 1053    |
| 21-5            | 0.00042                         | 0.70345                         | 0.70344                                           | 0.12962                           | 0.51272                           | 5.3                                   | 781     |
| 21-6            | 0.00005                         | 0.70343                         | 0.70343                                           | 0.11972                           | 0.51264                           | 4.3                                   | 825     |
| 21-7            | 0.00307                         | 0.70360                         | 0.70358                                           | 0.13324                           | 0.51269                           | 4.5                                   | 877     |
| 21-8            | 0.00067                         | 0.70354                         | 0.70353                                           | 0.12336                           | 0.51269                           | 5                                     | 781     |
| 21-9            | 0.00111                         | 0.70346                         | 0.70346                                           | 0.12494                           | 0.51265                           | 4.3                                   | 855     |
| 21-10           | 0.00022                         | 0.70338                         | 0.70338                                           | 0.11976                           | 0.51266                           | 4.8                                   | 792     |
| 21-11           | 0.00027                         | 0.70337                         | 0.70337                                           | 0.11834                           | 0.51260                           | 3.7                                   | 872     |
| 21-12           | 0.00022                         | 0.70389                         | 0.70389                                           | 0.11163                           | 0.51268                           | 5.5                                   | 705     |
| 21-13           | 0.00095                         | 0.70359                         | 0.70359                                           | 0.12940                           | 0.51258                           | 2.5                                   | 1038    |
| 21-14           | 0.00118                         | 0.70345                         | 0.70345                                           | 0.12113                           | 0.51271                           | 5.5                                   | 733     |
| 21-15           | 0.00018                         | 0.70345                         | 0.70345                                           | 0.11927                           | 0.51271                           | 5.7                                   | 712     |
| 21-16           | 0.00009                         | 0.70344                         | 0.70344                                           | 0.12594                           | 0.51267                           | 4.6                                   | 829     |
| 21-17           | 0.00012                         | 0.70338                         | 0.70338                                           | 0.12088                           | 0.51264                           | 4.3                                   | 833     |
| 21-18           | 0.00010                         | 0.70347                         | 0.70347                                           | 0.11436                           | 0.51266                           | 5                                     | 752     |
| 21-19           | 0.00142                         | 0.70371                         | 0.70370                                           | 0.11524                           | 0.51263                           | 4.3                                   | 812     |
| 21-20           | 0.01507                         | 0.70371                         | 0.70362                                           | 0.10752                           | 0.51270                           | 6.2                                   | 643     |
