# Supplementary material
Source: MDPI journal article supplement (https://www.mdpi.com/2075-163X/12/5/587)
Supplement: s1 [file s1]

**Table S2.** In situ trace elements (ppm) of apatite grains in the SXD carbonatite.

| Spot No.         | 02-1  | 02-2  | 02-3  | 02-4  | 02-5  | 02-6  | 02-7  | 02-8  | 02-9  | 02-10  |
|------------------|-------|-------|-------|-------|-------|-------|-------|-------|-------|--------|
| <b>SXD15-02</b>  |       |       |       |       |       |       |       |       |       |        |
| Sc               | 3.3   | 4.65  | 2.73  | 2.95  | 4.01  | 3.47  | 2.9   | 3.86  | 3.24  | 2.67   |
| Ti               | 39    | 19.4  | 22.9  | 35.4  | 20    | 43.5  | 28.3  | 23    | 22.9  | 32     |
| V                | 20    | 36.2  | 55.6  | 16.9  | 27.9  | 33.3  | 38    | 25.6  | 1.35  | 1.71   |
| Cr               | 45.2  | 43.8  | 50.1  | 42.6  | 47.1  | 53.7  | 51.7  | 49.5  | 41.9  | 48.5   |
| Mn               | 298   | 560   | 565   | 252   | 387   | 343   | 366   | 448   | 95.5  | 120    |
| Fe               | 259   | 352   | 298   | 289   | 293   | 322   | 295   | 297   | 245   | 323    |
| Co               | 7.44  | 7.73  | 8.28  | 7.49  | 8.49  | 8.26  | 8.8   | 7.88  | 6.73  | 7.99   |
| Ni               | 16.8  | 13.7  | 15.8  | 16.6  | 20.5  | 16.4  | 20.5  | 17.2  | 12    | 14.2   |
| Rb               | 1.31  | 0.72  | 0.64  | 0.61  | 0.48  | 0.47  | 0.93  | 0.69  | 0.45  | 0.85   |
| Sr               | 12883 | 11657 | 11271 | 13482 | 12170 | 12204 | 11115 | 11471 | 14950 | 15505  |
| Y                | 364   | 290   | 328   | 382   | 316   | 362   | 355   | 309   | 490   | 345    |
| Zr               | 0.97  | 0.97  | 1.23  | 1.08  | 1.36  | 1.23  | 1.17  | 1.24  | 0.85  | 0.97   |
| Nb               | 0.5   | 1.16  | 3.22  | 0.43  | 0.79  | 1.1   | 1.28  | 0.85  | 0.21  | 0.16   |
| Cs               | 0.17  | 0.13  | 0.1   | 0.14  | 0.13  | 0.15  | 0.15  | 0.19  | 0.11  | 0.21   |
| Ba               | 49.9  | 32    | 37.7  | 25.6  | 26.1  | 22.6  | 26.5  | 24.9  | 7.77  | 19.8   |
| La               | 1351  | 1558  | 1750  | 1299  | 1514  | 1564  | 1425  | 1334  | 496   | 1439   |
| Ce               | 3165  | 3323  | 3660  | 3121  | 3299  | 3466  | 3145  | 2999  | 1839  | 4020   |
| Pr               | 409   | 394   | 435   | 412   | 401   | 428   | 386   | 371   | 311   | 555    |
| Nd               | 1755  | 1602  | 1736  | 1842  | 1693  | 1822  | 1640  | 1574  | 1742  | 2481   |
| Sm               | 331   | 259   | 283   | 383   | 301   | 339   | 303   | 269   | 547   | 472    |
| Eu               | 96.3  | 76.6  | 81.3  | 117   | 89.7  | 106   | 89.8  | 77.1  | 186   | 131    |
| Gd               | 240   | 176   | 187   | 284   | 218   | 255   | 214   | 186   | 453   | 299    |
| Tb               | 26.8  | 20.3  | 22.8  | 32.2  | 25.3  | 28.8  | 25.5  | 21.3  | 48.6  | 31.3   |
| Dy               | 116   | 91.2  | 98.6  | 128   | 101   | 122   | 108   | 94.4  | 186   | 122    |
| Ho               | 15.9  | 12.4  | 14.1  | 17.4  | 14.5  | 16.1  | 16.2  | 14    | 22    | 15.9   |
| Er               | 28.1  | 23.8  | 26.9  | 28.2  | 24.6  | 30.2  | 28.4  | 24.5  | 33    | 24.8   |
| Tm               | 2.47  | 2.14  | 2.7   | 2.59  | 2     | 2.65  | 2.72  | 2.52  | 2.46  | 2.22   |
| Yb               | 12.4  | 11    | 13.3  | 10.1  | 9.42  | 10.9  | 12.4  | 11    | 10.1  | 8.67   |
| Lu               | 1.06  | 1.05  | 1.25  | 1.01  | 1.14  | 1     | 1.25  | 1.16  | 0.82  | 0.74   |
| Hf               | 0.23  | 0.29  | 0.28  | 0.27  | 0.25  | 0.29  | 0.17  | 0.16  | 0.24  | 0.32   |
| Ta               | 0.04  | 0.06  | 0.06  | 0.04  | 0.05  | 0.05  | 0.05  | 0.04  | 0.04  | 0.07   |
| Th               | 11.2  | 15    | 30.7  | 11.2  | 11    | 19.5  | 18.3  | 11.7  | 0.3   | 7.35   |
| U                | 0.1   | 0.24  | 1.07  | 0.15  | 0.22  | 0.6   | 0.5   | 0.1   | 0.04  | 0.08   |
| Pb               | 10.2  | 9.86  | 10.3  | 9.55  | 9.22  | 9.49  | 9.66  | 10.2  | 7.83  | 9.77   |
| Spot No.         | 04B-1 | 04B-2 | 04B-3 | 04B-4 | 04B-5 | 04B-6 | 04B-7 | 04B-8 | 04B-9 | 04B-10 |
| <b>SXD15-04B</b> |       |       |       |       |       |       |       |       |       |        |
| Sc               | 2.32  | 11.5  | 10.2  | 9     | 8.7   | 8.04  | 8.88  | 8.45  | 8.81  | 10.6   |
| Ti               | 21.6  | 52.1  | 60.6  | 110   | 56.3  | 74    | 74.1  | 59.7  | 48    | 79.7   |
| V                | 1.38  | 3.65  | 4     | 5.24  | 7.88  | 3.78  | 4.24  | 5.12  | 4.75  | 27.9   |

|                 |        |        |        |        |        |        |        |        |                 |        |
|-----------------|--------|--------|--------|--------|--------|--------|--------|--------|-----------------|--------|
| Cr              | 24.5   | 110    | 117    | 111    | 129    | 119    | 113    | 110    | 111             | 142    |
| Mn              | 61.5   | 281    | 304    | 337    | 286    | 295    | 287    | 391    | 279             | 859    |
| Fe              | 160    | 935    | 816    | 793    | 740    | 713    | 721    | 686    | 791             | 789    |
| Co              | 4.47   | 19.1   | 20.1   | 21.6   | 19.5   | 19.4   | 19.8   | 18.6   | 20.6            | 22     |
| Ni              | 9.48   | 43.5   | 51.5   | 43.1   | 36.2   | 42.2   | 44.3   | 36.3   | 37.8            | 51.7   |
| Rb              | 0.37   | 1.02   | 1.68   | 1.92   | 0.9    | 1.94   | 1.12   | 1.31   | 1.33            | 2.1    |
| Sr              | 3736   | 16,633 | 18,883 | 16,831 | 18,002 | 17,855 | 18,047 | 15,803 | 17,640          | 16,539 |
| Y               | 124    | 543    | 579    | 498    | 531    | 582    | 515    | 509    | 514             | 408    |
| Zr              | 0.53   | 2.22   | 3.11   | 2.26   | 2.53   | 2.44   | 2.83   | 1.95   | 2.05            | 2.48   |
| Nb              | 0.11   | 0.55   | 0.52   | 0.68   | 0.45   | 0.46   | 0.5    | 0.56   | 0.47            | 1.56   |
| Cs              | 0.09   | 0.2    | 0.45   | 0.41   | 0.46   | 0.35   | 0.25   | 0.35   | 0.4             | 0.38   |
| Ba              | 4.29   | 19.5   | 22.5   | 18     | 18.1   | 20.2   | 19.4   | 17.9   | 20.7            | 46.1   |
| La              | 186    | 737    | 938    | 912    | 819    | 923    | 882    | 1058   | 875             | 3453   |
| Ce              | 581    | 2382   | 2971   | 2891   | 2600   | 2918   | 2776   | 3362   | 2744            | 6881   |
| Pr              | 86.7   | 357    | 438    | 426    | 390    | 429    | 408    | 492    | 403             | 739    |
| Nd              | 416    | 1727   | 2144   | 2032   | 1861   | 2068   | 1933   | 2283   | 1907            | 2872   |
| Sm              | 93     | 395    | 478    | 421    | 441    | 452    | 411    | 444    | 421             | 426    |
| Eu              | 29.1   | 123    | 144    | 125    | 133    | 136    | 124    | 131    | 127             | 112    |
| Gd              | 74     | 309    | 364    | 304    | 330    | 340    | 304    | 315    | 311             | 259    |
| Tb              | 9.2    | 37.8   | 43.4   | 35     | 41.1   | 41.2   | 38     | 35.8   | 38.5            | 29.4   |
| Dy              | 38.9   | 167    | 184    | 158    | 171    | 183    | 159    | 158    | 162             | 124    |
| Ho              | 5.4    | 23.1   | 25.4   | 21.2   | 23.5   | 24.8   | 21.8   | 22.4   | 23.2            | 18.1   |
| Er              | 9.48   | 40     | 43.1   | 39.5   | 40.8   | 45.6   | 38.4   | 38.8   | 39.8            | 33.2   |
| Tm              | 0.81   | 3.72   | 4.19   | 3.59   | 3.74   | 3.6    | 3.33   | 3.75   | 3.8             | 3.24   |
| Yb              | 3.3    | 16.6   | 15.8   | 15.9   | 14.3   | 17     | 14.2   | 17.6   | 14.4            | 14.5   |
| Lu              | 0.33   | 1.36   | 1.42   | 1.53   | 1.28   | 1.71   | 1.32   | 1.51   | 1.37            | 1.74   |
| Hf              | 0.18   | 0.43   | 0.82   | 0.81   | 0.76   | 0.55   | 1.1    | 0.61   | 0.56            | 0.59   |
| Ta              | 0.02   | 0.14   | 0.05   | 0.11   | 0.09   | 0.05   | 0.08   | 0.1    | 0.11            | 0.09   |
| Th              | 3.45   | 13.3   | 20     | 11.8   | 14.2   | 20.4   | 14.3   | 12.4   | 11.6            | 28.8   |
| U               | 0.03   | 0.12   | 0.16   | 0.13   | 0.13   | 0.12   | 0.12   | 0.1    | 0.08            | 0.12   |
| Pb              | 4.23   | 21     | 25.6   | 21.5   | 19     | 19.1   | 20.1   | 20.2   | 21.6            | 17.6   |
| Spot No.        | 09-1   | 09-2   | 09-3   | 09-6   | 09-7   | 09-8   | 09-9   | 09-10  | 26-1            |        |
| <b>SXD15-09</b> |        |        |        |        |        |        |        |        | <b>SXD15-26</b> |        |
| Sc              | 6.76   | 7.63   | 5.36   | 5.74   | 6.92   | 7.18   | 7.6    | 6.77   | 8.25            |        |
| Ti              | 72.9   | 63.2   | 39.3   | 52.8   | 65     | 69.1   | 84.4   | 28.4   | 63.9            |        |
| V               | 4.98   | 5.9    | 3.1    | 2.41   | 5.13   | 4.72   | 3.85   | 5.26   | 19.8            |        |
| Cr              | 87.7   | 83.8   | 81.6   | 80.2   | 95.7   | 96.2   | 83.6   | 95.3   | 131             |        |
| Mn              | 428    | 431    | 375    | 374    | 422    | 339    | 503    | 425    | 435             |        |
| Fe              | 441    | 484    | 392    | 400    | 628    | 577    | 523    | 553    | 840             |        |
| Co              | 13.2   | 15.9   | 11     | 10.7   | 15     | 17.1   | 15.8   | 13.3   | 20.4            |        |
| Ni              | 30.9   | 31.4   | 22.5   | 19.2   | 33.2   | 30.5   | 31.3   | 34.2   | 42.8            |        |
| Rb              | 1.55   | 1.32   | 1      | 0.82   | 1.57   | 1.61   | 1.86   | 0.94   | 1.43            |        |
| Sr              | 24,360 | 24,504 | 24,772 | 26,740 | 24,134 | 23,255 | 26,958 | 24,261 | 14,585          |        |
| Y               | 463    | 458    | 418    | 460    | 407    | 511    | 720    | 464    | 297             |        |

|                 |        |       |        |        |        |       |       |        |        |
|-----------------|--------|-------|--------|--------|--------|-------|-------|--------|--------|
| Zr              | 1.86   | 2.35  | 1.46   | 1.64   | 1.98   | 1.92  | 1.79  | 1.81   | 3.12   |
| Nb              | 0.29   | 0.52  | 0.22   | 0.22   | 0.46   | 0.52  | 0.41  | 0.35   | 0.42   |
| Cs              | 0.23   | 0.32  | 0.2    | 0.17   | 0.26   | 0.14  | 0.29  | 0.29   | 0.55   |
| Ba              | 18.1   | 18.3  | 39.5   | 277    | 107    | 12.2  | 33.1  | 19.6   | 45.7   |
| La              | 991    | 756   | 1049   | 1290   | 1100   | 685   | 1369  | 361    | 1787   |
| Ce              | 2621   | 2164  | 2860   | 3393   | 3000   | 1969  | 3555  | 1107   | 3804   |
| Pr              | 356    | 301   | 386    | 459    | 403    | 276   | 476   | 160    | 450    |
| Nd              | 1637   | 1394  | 1770   | 2078   | 1763   | 1315  | 2199  | 790    | 1815   |
| Sm              | 411    | 353   | 389    | 451    | 364    | 329   | 523   | 249    | 289    |
| Eu              | 135    | 118   | 118    | 144    | 112    | 110   | 179   | 94.7   | 83.5   |
| Gd              | 340    | 302   | 295    | 348    | 267    | 302   | 464   | 270    | 196    |
| Tb              | 43.1   | 38    | 34.2   | 39.6   | 33.2   | 41.1  | 58.8  | 37.4   | 22.2   |
| Dy              | 176    | 166   | 146    | 169    | 140    | 185   | 257   | 168    | 93.1   |
| Ho              | 24.7   | 22.4  | 19.7   | 23.2   | 19.3   | 25.6  | 33.5  | 23.6   | 13.1   |
| Er              | 40.2   | 36.8  | 35     | 37.3   | 34.1   | 41.2  | 57.6  | 39     | 23.3   |
| Tm              | 3.49   | 3.1   | 2.92   | 3.37   | 2.86   | 3.42  | 4.62  | 3.54   | 2.14   |
| Yb              | 14.2   | 13.5  | 12.4   | 12.7   | 13.3   | 13.1  | 19.5  | 14.1   | 11.8   |
| Lu              | 1.18   | 1.08  | 1.04   | 1.13   | 1.11   | 1.24  | 1.56  | 1.29   | 1.09   |
| Hf              | 0.39   | 0.53  | 0.33   | 0.33   | 0.63   | 0.31  | 0.43  | 0.54   | 0.42   |
| Ta              | 0.07   | 0.05  | 0.03   | 0.04   | 0.09   | 0.1   | 0.12  | 0.07   | 0.1    |
| Th              | 4.26   | 4.6   | 7.77   | 15.3   | 5.5    | 1.73  | 37.2  | 4.61   | 9.97   |
| U               | 0.05   | 0.12  | 0.07   | 0.07   | 0.11   | 0.05  | 0.1   | 0.06   | 0.16   |
| Pb              | 19.1   | 17.4  | 15.5   | 19.4   | 17.2   | 16.3  | 24    | 18.3   | 17.4   |
| Spot No.        | 26-2   | 26-3  | 26-4   | 26-5   | 26-6   | 26-7  | 26-8  | 26-9   | 26-10  |
| <b>SXD15-26</b> |        |       |        |        |        |       |       |        |        |
| Sc              | 6.17   | 9.03  | 8.15   | 10.3   | 10.5   | 10.1  | 6.97  | 11.9   | 9.14   |
| Ti              | 69.5   | 49.5  | 81.5   | 84     | 72.7   | 50.8  | 90.3  | 87     | 100    |
| V               | 4.56   | 8.69  | 6.53   | 6.4    | 28.5   | 11.1  | 18.7  | 4.04   | 3.72   |
| Cr              | 100    | 134   | 125    | 667    | 113    | 116   | 128   | 115    | 132    |
| Mn              | 226    | 403   | 274    | 104    | 219    | 362   | 313   | 167    | 159    |
| Fe              | 626    | 732   | 791    | 765    | 817    | 788   | 718   | 796    | 891    |
| Co              | 17.4   | 18.9  | 19.9   | 21.3   | 22.1   | 19.6  | 20    | 21.2   | 21.3   |
| Ni              | 38.1   | 40.6  | 45.8   | 47.2   | 46.8   | 36.9  | 45.9  | 43.6   | 45.3   |
| Rb              | 1.49   | 1.67  | 2.35   | 1.26   | 2      | 1.56  | 2.1   | 1.38   | 2.08   |
| Sr              |        | 14,59 |        |        |        | 17,15 | 12,30 |        |        |
|                 | 14,404 | 6     | 17,475 | 13,390 | 10,864 | 0     | 6     | 16,697 | 15,084 |
| Y               | 397    | 364   | 385    | 431    | 352    | 398   | 448   | 433    | 363    |
| Zr              | 2.12   | 3.63  | 1.55   | 3.05   | 2.67   | 2.78  | 3.13  | 3.01   | 2.45   |
| Nb              | 0.32   | 0.52  | 3.31   | 0.63   | 0.7    | 0.64  | 0.61  | 1.18   | 0.56   |
| Cs              | 0.38   | 0.37  | 0.19   | 0.34   | 0.27   | 0.38  | 0.25  | 0.42   | 0.28   |
| Ba              | 23.8   | 27.5  | 130    | 18.2   | 21.1   | 33.3  | 24.6  | 59.1   | 17.9   |
| La              | 559    | 1579  | 1336   | 485    | 996    | 1605  | 1103  | 999    | 626    |
| Ce              | 1794   | 3551  | 3120   | 1604   | 2334   | 3912  | 2421  | 2931   | 1920   |
| Pr              | 265    | 438   | 394    | 252    | 301    | 527   | 290   | 416    | 282    |

|    |      |      |      |      |      |      |      |      |      |
|----|------|------|------|------|------|------|------|------|------|
| Nd | 1297 | 1851 | 1714 | 1303 | 1325 | 2507 | 1252 | 1955 | 1354 |
| Sm | 321  | 337  | 328  | 360  | 274  | 609  | 334  | 408  | 315  |
| Eu | 101  | 98.1 | 95.3 | 125  | 87.5 | 176  | 126  | 126  | 102  |
| Gd | 263  | 235  | 238  | 320  | 222  | 395  | 345  | 310  | 252  |
| Tb | 30.9 | 27.6 | 27.3 | 37.6 | 26.7 | 39.1 | 42.2 | 34.7 | 30.5 |
| Dy | 135  | 114  | 121  | 147  | 113  | 147  | 165  | 145  | 123  |
| Ho | 17.1 | 16   | 16.6 | 18.9 | 15.1 | 19.2 | 20.1 | 19.1 | 16.5 |
| Er | 28.3 | 26.7 | 29   | 29.4 | 26.3 | 31.7 | 32.4 | 32.4 | 27.4 |
| Tm | 2.6  | 2.42 | 2.85 | 2.27 | 2.46 | 2.53 | 2.6  | 2.74 | 2.33 |
| Yb | 9.63 | 10.5 | 11.5 | 9.21 | 9.25 | 12   | 11.7 | 12.2 | 10.5 |
| Lu | 0.99 | 1.07 | 1.08 | 0.71 | 0.97 | 0.95 | 1.17 | 0.95 | 1.02 |
| Hf | 0.46 | 0.57 | 0.59 | 0.23 | 0.42 | 0.92 | 0.68 | 0.58 | 0.76 |
| Ta | 0.11 | 0.08 | 0.13 | 0.13 | 0.07 | 0.13 | 0.12 | 0.12 | 0.11 |
| Th | 8.76 | 5.67 | 8.06 | 1.82 | 18.1 | 35.5 | 14   | 7.4  | 2.85 |
| U  | 0.1  | 0.1  | 0.13 | 0.06 | 0.79 | 0.12 | 0.37 | 0.1  | 0.12 |
| Pb | 48.1 | 16.8 | 20.7 | 17.1 | 19.6 | 17.6 | 16.4 | 21   | 19.9 |

---

**Table S2.** In situ trace elements (ppm) of apatite grains in the SXD syenite.

| Spot No.        | 08-1   | 08-2   | 08-3   | 08-4   | 08-5   | 08-6   | 08-7   | 08-8   | 08-9   | 08-10  |
|-----------------|--------|--------|--------|--------|--------|--------|--------|--------|--------|--------|
| <b>SXD15-08</b> |        |        |        |        |        |        |        |        |        |        |
| Sc              | 5.16   | 5.57   | 5.5    | 6.12   | 8.41   | 7.02   | 8.55   | 8.26   | 9.16   | 7.23   |
| Ti              | 55     | 51.4   | 51.6   | 48     | 91     | 85.2   | 47.4   | 57.9   | 74.5   | 55     |
| V               | 17.8   | 2.71   | 3.41   | 3.29   | 3.22   | 5.03   | 4.84   | 4.86   | 4.46   | 4.35   |
| Cr              | 74.2   | 77.1   | 84.4   | 74.9   | 89.8   | 95.8   | 106    | 101    | 105    | 74.5   |
| Mn              | 589    | 612    | 576    | 619    | 718    | 560    | 731    | 738    | 640    | 658    |
| Fe              | 484    | 400    | 489    | 519    | 585    | 582    | 547    | 566    | 552    | 591    |
| Co              | 11.6   | 11.8   | 12     | 12.9   | 14.5   | 16.6   | 15.5   | 17     | 16.4   | 15     |
| Ni              | 26.5   | 20.7   | 25.8   | 29     | 25.2   | 32.7   | 37.6   | 32.5   | 25.8   | 25.2   |
| Rb              | 1.14   | 0.98   | 1.08   | 1.3    | 1.35   | 1.09   | 1.17   | 1.36   | 1.32   | 1.29   |
| Sr              | 17,606 | 21,457 | 22,709 | 25,775 | 24,194 | 19,142 | 25,086 | 24,500 | 23,509 | 24,170 |
| Y               | 1001   | 895    | 890    | 1013   | 856    | 1032   | 984    | 874    | 905    | 920    |
| Zr              | 2.23   | 1.89   | 1.93   | 1.92   | 1.55   | 1.53   | 1.87   | 2.52   | 2.04   | 2.1    |
| Nb              | 0.35   | 0.32   | 0.31   | 0.23   | 0.32   | 0.52   | 0.51   | 0.23   | 0.38   | 0.46   |
| Cs              | 0.23   | 0.12   | 0.24   | 0.21   | 0.07   | 0.15   | 0.34   | 0.26   | 0.32   | 0.24   |
| Ba              | 11.5   | 7.59   | 13.6   | 6.35   | 8.31   | 12.2   | 7.58   | 7.85   | 6.77   | 9.23   |
| La              | 2074   | 936    | 1753   | 2670   | 1106   | 1219   | 1654   | 1338   | 1555   | 1202   |
| Ce              | 4963   | 2975   | 4426   | 8648   | 3662   | 3251   | 5210   | 4175   | 5278   | 3751   |
| Pr              | 588    | 439    | 544    | 1154   | 537    | 444    | 721    | 585    | 767    | 554    |
| Nd              | 2523   | 2109   | 2494   | 5471   | 2585   | 2059   | 3408   | 2767   | 3807   | 2642   |
| Sm              | 523    | 550    | 569    | 1104   | 656    | 523    | 776    | 650    | 888    | 646    |
| Eu              | 178    | 191    | 195    | 322    | 215    | 176    | 254    | 216    | 266    | 214    |
| Gd              | 457    | 490    | 471    | 738    | 538    | 474    | 600    | 535    | 631    | 548    |
| Tb              | 62     | 65.1   | 65.2   | 82.9   | 66     | 66.1   | 74.2   | 68     | 74.6   | 70.3   |
| Dy              | 289    | 290    | 286    | 349    | 289    | 323    | 315    | 289    | 313    | 306    |
| Ho              | 44.9   | 41.2   | 40.8   | 47     | 38.7   | 45.8   | 45.4   | 40.8   | 42.1   | 43.6   |
| Er              | 85.1   | 75.4   | 73.3   | 81.7   | 70.1   | 83     | 79.1   | 69.6   | 71.2   | 73.5   |
| Tm              | 8.33   | 6.64   | 6.91   | 7.44   | 6.28   | 7.53   | 7.29   | 6.16   | 6.32   | 6.74   |
| Yb              | 34.5   | 30.2   | 27.7   | 30.1   | 28.2   | 29.3   | 31.5   | 27.9   | 25.4   | 29.6   |
| Lu              | 3.42   | 2.75   | 2.71   | 2.55   | 2.4    | 2.83   | 2.65   | 2.6    | 2.48   | 2.45   |
| Hf              | 0.35   | 0.37   | 0.44   | 0.53   | 0.45   | 0.54   | 0.42   | 0.32   | 0.31   | 0.6    |
| Ta              | 0.06   | 0.06   | 0.05   | 0.06   | 0.09   | 0.09   | 0.08   | 0.12   | 0.06   | 0.09   |
| Th              | 78.2   | 16.2   | 19     | 13.8   | 16.2   | 12.3   | 22.1   | 25.2   | 11.6   | 23.6   |
| U               | 0.84   | 0.06   | 0.08   | 0.1    | 0.11   | 0.1    | 0.08   | 0.08   | 0.1    | 0.07   |
| Pb              | 23     | 20.8   | 20.7   | 21.7   | 24.3   | 19.9   | 24     | 26.1   | 23.2   | 23.4   |
| Spot No.        | 10-1   | 10-2   | 10-3   | 10-4   | 10-5   | 10-6   | 10-7   | 10-8   | 10-9   | 10-10  |
| <b>SXD15-10</b> |        |        |        |        |        |        |        |        |        |        |
| Sc              | 2.54   | 3.19   | 4.06   | 2.88   | 2.99   | 4.15   | 3.48   | 4.28   | 4.01   | 4.23   |
| Ti              | 28.3   | 23     | 19.3   | 24     | 38.4   | 33.9   | 34.4   | 27     | 24.8   | 36     |
| V               | 1.06   | 1.57   | 1.14   | 1.88   | 2.66   | 3.58   | 2.34   | 2.87   | 4.75   | 2.12   |
| Cr              | 52.3   | 54.1   | 53.1   | 42.5   | 46.6   | 58     | 51.9   | 52.3   | 50     | 58.7   |

|    |        |        |        |        |        |        |        |        |        |        |
|----|--------|--------|--------|--------|--------|--------|--------|--------|--------|--------|
| Mn | 546    | 521    | 446    | 537    | 530    | 514    | 549    | 531    | 853    | 598    |
| Fe | 262    | 269    | 295    | 221    | 257    | 361    | 288    | 280    | 1711   | 310    |
| Co | 7.71   | 7.98   | 8.47   | 6.31   | 8.03   | 8.57   | 8.95   | 8.59   | 8.96   | 8.72   |
| Ni | 17.5   | 15.3   | 15.7   | 12.5   | 20.4   | 13.9   | 19.4   | 16.5   | 18.9   | 18.5   |
| Rb | 0.5    | 0.92   | 0.86   | 0.61   | 0.65   | 0.8    | 0.68   | 0.85   | 0.9    | 0.82   |
| Sr | 23,076 | 21,597 | 19,868 | 22,405 | 22,181 | 21,214 | 23,186 | 22,067 | 21,337 | 21,639 |
| Y  | 847    | 829    | 908    | 883    | 775    | 788    | 895    | 856    | 796    | 885    |
| Zr | 0.78   | 0.89   | 1.33   | 1      | 0.97   | 1.27   | 0.93   | 0.96   | 1.02   | 1.22   |
| Nb | 0.25   | 0.25   | 0.38   | 0.2    | 0.32   | 0.3    | 0.26   | 0.23   | 0.3    | 0.22   |
| Cs | 0.1    | 0.18   | 0.09   | 0.09   | 0.17   | 0.12   | 0.19   | 0.09   | 0.11   | 0.16   |
| Ba | 17.2   | 17.3   | 12.7   | 20.7   | 17.6   | 18.1   | 17     | 19.5   | 25.9   | 18.2   |
| La | 814    | 821    | 592    | 853    | 756    | 718    | 1184   | 720    | 708    | 793    |
| Ce | 2506   | 2505   | 1796   | 2563   | 2301   | 2127   | 3437   | 2181   | 2180   | 2360   |
| Pr | 371    | 362    | 263    | 370    | 335    | 305    | 489    | 318    | 318    | 344    |
| Nd | 1811   | 1753   | 1300   | 1814   | 1649   | 1486   | 2338   | 1575   | 1548   | 1675   |
| Sm | 506    | 463    | 375    | 498    | 468    | 409    | 611    | 453    | 428    | 456    |
| Eu | 170    | 157    | 138    | 166    | 158    | 149    | 204    | 159    | 150    | 161    |
| Gd | 439    | 424    | 376    | 436    | 418    | 385    | 503    | 419    | 384    | 418    |
| Tb | 60.3   | 57.8   | 54.5   | 57.4   | 55.9   | 52.1   | 65.4   | 58.6   | 53.9   | 58.8   |
| Dy | 272    | 264    | 270    | 272    | 252    | 246    | 294    | 274    | 249    | 278    |
| Ho | 39.3   | 38.2   | 41.6   | 39     | 35.4   | 36.2   | 40.6   | 38.7   | 37     | 40     |
| Er | 69.6   | 68.3   | 75.4   | 70     | 64.4   | 64     | 72.3   | 68.9   | 65.1   | 74.5   |
| Tm | 6.87   | 6.23   | 6.84   | 7.17   | 6.56   | 5.84   | 6.24   | 6.55   | 6.3    | 6.96   |
| Yb | 29.5   | 27.9   | 27     | 29.1   | 26.4   | 27.8   | 30.2   | 29.2   | 25.6   | 27.7   |
| Lu | 2.56   | 2.51   | 2.54   | 2.59   | 2.55   | 2.42   | 2.89   | 2.75   | 2.34   | 2.78   |
| Hf | 0.27   | 0.28   | 0.29   | 0.29   | 0.29   | 0.32   | 0.24   | 0.4    | 0.35   | 0.18   |
| Ta | 0.07   | 0.05   | 0.05   | 0.04   | 0.05   | 0.08   | 0.05   | 0.06   | 0.05   | 0.06   |
| Th | 16.3   | 14     | 8.2    | 18.5   | 9.35   | 7.88   | 23.6   | 13.5   | 11.7   | 17.6   |
| U  | 0.11   | 0.13   | 0.1    | 0.36   | 0.13   | 0.12   | 0.05   | 0.16   | 0.25   | 0.23   |
| Pb | 20.7   | 21.5   | 17.2   | 20.9   | 20.2   | 20.2   | 21.9   | 21     | 23.8   | 22     |

---

**Table S3.** In situ trace elements (ppm) of apatite grains in the SXD hornblendite.

| Spot No.      | 21-1            | 21-2 | 21-3 | 21-4 | 21-5 | 21-6 | 21-7 | 21-8 | 21-9 |
|---------------|-----------------|------|------|------|------|------|------|------|------|
| <b>Sample</b> | <b>SXD15-21</b> |      |      |      |      |      |      |      |      |
| Sc            | 9.54            | 6.2  | 8.14 | 9.57 | 7.76 | 8.89 | 7.77 | 6.66 | 6.07 |
| Ti            | 85.2            | 53   | 51.3 | 44.6 | 58.2 | 57.3 | 38.9 | 32.5 | 78.4 |
| V             | 83.1            | 80.5 | 59.9 | 64.3 | 58.7 | 70   | 63.7 | 72.2 | 63.6 |
| Cr            | 113             | 78.2 | 90.2 | 103  | 113  | 113  | 107  | 80.6 | 103  |
| Mn            | 266             | 735  | 99.5 | 223  | 313  | 342  | 178  | 396  | 333  |
| Fe            | 693             | 1782 | 593  | 780  | 634  | 633  | 609  | 670  | 761  |
| Co            | 18              | 11.8 | 17.2 | 18.5 | 17.5 | 17.6 | 16.3 | 16.4 | 15.5 |
| Ni            | 36.6            | 27.8 | 34.7 | 39.9 | 41   | 33.6 | 33.2 | 26.2 | 33.8 |
| Rb            | 1.77            | 1.03 | 1.42 | 1.74 | 1.88 | 1.25 | 1.2  | 1.36 | 1.53 |
| Sr            | 1753            | 2027 | 964  | 1571 | 1696 | 1997 | 1359 | 1396 | 1902 |
| Y             | 197             | 243  | 203  | 191  | 177  | 229  | 188  | 214  | 146  |
| Zr            | 3.53            | 35.2 | 2.41 | 32.9 | 7.71 | 8.78 | 15.6 | 10.8 | 5.98 |
| Nb            | 0.36            | 0.39 | 0.24 | 0.53 | 0.54 | 0.51 | 0.31 | 0.58 | 0.5  |
| Cs            | 0.29            | 0.29 | 0.44 | 0.44 | 0.43 | 0.26 | 0.29 | 0.34 | 0.31 |
| Ba            | 1.79            | 5.29 | 1.23 | 2.27 | 4.05 | 2.06 | 31.2 | 1.68 | 2.7  |
| La            | 637             | 540  | 288  | 379  | 539  | 701  | 367  | 661  | 373  |
| Ce            | 1224            | 1100 | 742  | 821  | 924  | 1253 | 811  | 1119 | 677  |
| Pr            | 141             | 139  | 103  | 107  | 102  | 142  | 107  | 125  | 81   |
| Nd            | 590             | 628  | 501  | 506  | 422  | 600  | 507  | 542  | 369  |
| Sm            | 106             | 125  | 100  | 98.4 | 73.9 | 110  | 97.4 | 103  | 70.7 |
| Eu            | 25.9            | 30.7 | 24   | 23.3 | 19.3 | 29.5 | 26.4 | 21.9 | 15.7 |
| Gd            | 77              | 95.8 | 84.4 | 84.2 | 59.4 | 81.9 | 84.4 | 81.3 | 60.5 |
| Tb            | 9.24            | 11.7 | 10.9 | 9.91 | 7.37 | 10.3 | 9.44 | 10   | 7.41 |
| Dy            | 45.5            | 58.7 | 49.7 | 50.3 | 39.6 | 52.7 | 46.1 | 50.5 | 33.1 |
| Ho            | 7.79            | 8.97 | 8.17 | 7.82 | 7    | 8.66 | 7.06 | 8.06 | 5.96 |
| Er            | 17.6            | 17.9 | 16.8 | 15.8 | 14.4 | 19.1 | 15.5 | 18.2 | 11.4 |
| Tm            | 1.8             | 1.94 | 1.87 | 1.79 | 1.7  | 2.39 | 1.51 | 1.7  | 1.29 |
| Yb            | 10.2            | 11.8 | 9.09 | 9.6  | 9.9  | 11.4 | 8.29 | 11.3 | 7.2  |
| Lu            | 1.36            | 1.26 | 1.18 | 1.13 | 1.33 | 1.4  | 0.91 | 1.35 | 0.94 |
| Hf            | 0.65            | 0.5  | 0.49 | 0.52 | 0.48 | 0.58 | 0.45 | 0.57 | 0.34 |
| Ta            | 0.08            | 0.06 | 0.12 | 0.04 | 0.09 | 0.11 | 0.1  | 0.1  | 0.09 |
| Th            | 18.4            | 21.9 | 11.3 | 13.2 | 23.2 | 26.1 | 8.93 | 17.4 | 8.22 |
| U             | 2.1             | 2.52 | 1.35 | 1.52 | 5.39 | 4.06 | 1.15 | 5.05 | 1.52 |
| Pb            | 17.9            | 82.3 | 9.48 | 20.8 | 26   | 30.5 | 11.3 | 25   | 23.3 |
