# Supplementary material
Source: MDPI journal article supplement (https://www.mdpi.com/2075-163X/12/5/587)
Supplement: s1 [file s1]

**Table S1.** Major element composition of apatite in Shaxiongdong carbonatite.

| Spot No.                       | 02-1                                        | 02-2   | 02-3   | 02-4   | 02-5   | 02-6   | 02-7   | 02-8   | 02-9   | 02-10  |
|--------------------------------|---------------------------------------------|--------|--------|--------|--------|--------|--------|--------|--------|--------|
| <b>SXD15-02</b>                |                                             |        |        |        |        |        |        |        |        |        |
| CaO                            | 53.19                                       | 53.12  | 52.89  | 52.50  | 53.13  | 54.13  | 52.72  | 54.60  | 52.34  | 52.70  |
| Ce <sub>2</sub> O <sub>3</sub> | 0.63                                        | 0.42   | 0.39   | 0.47   | 0.41   | 0.37   | 0.45   | 0.41   | 0.37   | 0.54   |
| La <sub>2</sub> O <sub>3</sub> | 0.34                                        | 0.23   | 0.31   | 0.28   | 0.27   | 0.26   | 0.29   | 0.14   | 0.19   | 0.18   |
| SrO                            | 0.29                                        | 0.46   | 0.53   | 0.69   | 0.61   | 0.50   | 0.71   | 0.55   | 0.57   | 0.92   |
| BaO                            | b.d.l.                                      | b.d.l. | b.d.l. | b.d.l. | 0.01   | b.d.l. | b.d.l. | b.d.l. | 0.03   | 0.02   |
| Na <sub>2</sub> O              | 0.19                                        | 0.33   | 0.34   | 0.42   | 0.34   | 0.35   | 0.39   | 0.44   | 0.26   | 0.27   |
| Pr <sub>2</sub> O <sub>3</sub> | b.d.l.                                      | b.d.l. | b.d.l. | 0.03   | b.d.l. | b.d.l. | b.d.l. | b.d.l. | 0.13   | 0.06   |
| Nd <sub>2</sub> O <sub>3</sub> | 0.12                                        | 0.09   | b.d.l. | 0.05   | b.d.l. | b.d.l. | 0.03   | b.d.l. | b.d.l. | 0.31   |
| P <sub>2</sub> O <sub>5</sub>  | 40.64                                       | 40.48  | 41.19  | 41.05  | 40.77  | 41.01  | 40.87  | 40.52  | 41.55  | 41.66  |
| SiO <sub>2</sub>               | 0.40                                        | 0.08   | 0.07   | 0.08   | 0.11   | 0.09   | 0.08   | 0.09   | 0.06   | b.d.l. |
| SO <sub>3</sub>                | 0.11                                        | 0.15   | 0.11   | 0.08   | 0.09   | 0.16   | 0.11   | 0.18   | 0.02   | 0.11   |
| MnO                            | b.d.l.                                      | b.d.l. | b.d.l. | b.d.l. | b.d.l. | b.d.l. | b.d.l. | b.d.l. | b.d.l. | b.d.l. |
| F                              | 3.50                                        | 3.39   | 3.43   | 3.46   | 3.19   | 4.00   | 3.84   | 3.61   | 3.31   | 3.78   |
| Cl                             | b.d.l.                                      | b.d.l. | b.d.l. | 0.01   | 0.02   | b.d.l. | 0.02   | b.d.l. | b.d.l. | b.d.l. |
| O-(F, Cl) <sub>2</sub>         | 1.48                                        | 1.43   | 1.44   | 1.46   | 1.35   | 1.69   | 1.62   | 1.52   | 1.39   | 1.59   |
| total                          | 97.94                                       | 97.32  | 97.82  | 97.68  | 97.60  | 99.18  | 97.88  | 99.03  | 97.43  | 98.97  |
| in apfu                        | Structural formula calculated for 8 cations |        |        |        |        |        |        |        |        |        |
| Ca                             | 4.91                                        | 4.92   | 4.88   | 4.86   | 4.90   | 4.93   | 4.87   | 4.96   | 4.85   | 4.84   |
| Na                             | 0.03                                        | 0.05   | 0.06   | 0.07   | 0.06   | 0.06   | 0.06   | 0.07   | 0.04   | 0.05   |
| Sr                             | 0.01                                        | 0.02   | 0.03   | 0.03   | 0.03   | 0.02   | 0.04   | 0.03   | 0.03   | 0.05   |
| Ba                             | —                                           | —      | —      | —      | 0.00   | —      | —      | —      | 0.00   | 0.00   |
| La                             | 0.01                                        | 0.01   | 0.01   | 0.01   | 0.01   | 0.01   | 0.01   | 0.00   | 0.01   | 0.01   |
| Ce                             | 0.02                                        | 0.01   | 0.01   | 0.01   | 0.01   | 0.01   | 0.01   | 0.01   | 0.01   | 0.02   |
| Pr                             | —                                           | —      | —      | 0.00   | —      | —      | —      | —      | 0.00   | 0.00   |
| Nd                             | 0.00                                        | 0.00   | —      | 0.00   | —      | —      | 0.00   | —      | —      | 0.01   |
| P                              | 2.97                                        | 2.96   | 3.00   | 3.00   | 2.97   | 2.95   | 2.99   | 2.91   | 3.04   | 3.02   |
| Si                             | 0.03                                        | 0.01   | 0.01   | 0.01   | 0.01   | 0.01   | 0.01   | 0.01   | 0.01   | —      |
| S                              | 0.01                                        | 0.01   | 0.01   | 0.01   | 0.01   | 0.01   | 0.01   | 0.01   | 0.00   | 0.01   |
| Mn                             | —                                           | —      | —      | —      | —      | —      | —      | —      | —      | —      |
| F                              | 0.96                                        | 0.93   | 0.93   | 0.95   | 0.87   | 1.08   | 1.05   | 0.97   | 0.90   | 1.02   |
| Cl                             | —                                           | —      | —      | 0.00   | 0.00   | —      | 0.00   | —      | —      | —      |
| Spot No.                       | 04B-1                                       | 04B-2  | 04B-3  | 04B-4  | 04B-5  | 04B-6  | 04B-7  | 04B-8  | 04B-9  | 04B-10 |
| <b>SXD15-04B</b>               |                                             |        |        |        |        |        |        |        |        |        |
| CaO                            | 53.31                                       | 53.67  | 52.74  | 53.16  | 52.87  | 53.57  | 52.68  | 52.99  | 51.86  | 52.49  |
| Ce <sub>2</sub> O <sub>3</sub> | 0.34                                        | 0.31   | 0.36   | 0.31   | 0.21   | 0.28   | 0.68   | 0.30   | 0.53   | 0.27   |
| La <sub>2</sub> O <sub>3</sub> | 0.08                                        | 0.14   | 0.16   | 0.13   | 0.11   | 0.10   | 0.43   | 0.05   | 0.31   | 0.10   |
| SrO                            | 1.01                                        | 1.32   | 1.23   | 1.30   | 0.92   | 1.10   | 1.03   | 1.15   | 1.05   | 1.09   |
| BaO                            | b.d.l.                                      | 0.04   | 0.05   | b.d.l. | 0.03   | 0.01   | 0.02   | b.d.l. | b.d.l. | 0.06   |

|                                |                                             |        |        |        |        |        |          |        |        |        |
|--------------------------------|---------------------------------------------|--------|--------|--------|--------|--------|----------|--------|--------|--------|
| Na <sub>2</sub> O              | 0.20                                        | 0.18   | 0.19   | 0.20   | 0.20   | 0.19   | 0.56     | 0.22   | 0.29   | 0.26   |
| Pr <sub>2</sub> O <sub>3</sub> | 0.05                                        | 0.11   | b.d.l. | b.d.l. | 0.05   | 0.07   | b.d.l.   | b.d.l. | 0.01   | b.d.l. |
| Nd <sub>2</sub> O <sub>3</sub> | 0.12                                        | 0.13   | 0.13   | 0.17   | 0.08   | 0.14   | 0.04     | 0.18   | 0.13   | 0.11   |
| P <sub>2</sub> O <sub>5</sub>  | 41.44                                       | 40.57  | 41.58  | 41.25  | 41.69  | 40.82  | 40.56    | 41.33  | 40.53  | 41.95  |
| SiO <sub>2</sub>               | 0.11                                        | 0.05   | b.d.l. | b.d.l. | 0.04   | 0.02   | 0.06     | 0.05   | 0.11   | 0.02   |
| SO <sub>3</sub>                | 0.05                                        | 0.12   | 0.05   | b.d.l. | 0.08   | b.d.l. | 0.18     | 0.07   | 0.05   | 0.05   |
| MnO                            | b.d.l.                                      | b.d.l. | b.d.l. | b.d.l. | b.d.l. | b.d.l. | b.d.l.   | b.d.l. | b.d.l. | b.d.l. |
| F                              | 4.41                                        | 4.24   | 4.03   | 4.29   | 3.71   | 3.86   | 3.71     | 4.04   | 3.75   | 3.63   |
| Cl                             | b.d.l.                                      | b.d.l. | b.d.l. | b.d.l. | b.d.l. | b.d.l. | b.d.l.   | b.d.l. | b.d.l. | 0.03   |
| O-(F, Cl) <sub>2</sub>         | 1.86                                        | 1.79   | 1.70   | 1.81   | 1.56   | 1.63   | 1.56     | 1.70   | 1.58   | 1.53   |
| total                          | 99.26                                       | 99.08  | 98.82  | 99.01  | 98.42  | 98.55  | 98.37    | 98.68  | 97.04  | 98.51  |
| in apfu                        | Structural formula calculated for 8 cations |        |        |        |        |        |          |        |        |        |
| Ca                             | 4.89                                        | 4.93   | 4.86   | 4.89   | 4.87   | 4.93   | 4.85     | 4.88   | 4.85   | 4.83   |
| Na                             | 0.03                                        | 0.03   | 0.03   | 0.03   | 0.03   | 0.03   | 0.09     | 0.04   | 0.05   | 0.04   |
| Sr                             | 0.05                                        | 0.07   | 0.06   | 0.06   | 0.05   | 0.05   | 0.05     | 0.06   | 0.05   | 0.05   |
| Ba                             | —                                           | 0.00   | 0.00   | —      | 0.00   | 0.00   | 0.00     | —      | —      | 0.00   |
| La                             | 0.00                                        | 0.00   | 0.00   | 0.00   | 0.00   | 0.00   | 0.01     | 0.00   | 0.01   | 0.00   |
| Ce                             | 0.01                                        | 0.01   | 0.01   | 0.01   | 0.01   | 0.01   | 0.02     | 0.01   | 0.02   | 0.01   |
| Pr                             | 0.00                                        | 0.00   | —      | —      | 0.00   | 0.00   | —        | —      | 0.00   | —      |
| Nd                             | 0.00                                        | 0.00   | 0.00   | 0.01   | 0.00   | 0.00   | 0.00     | 0.01   | 0.00   | 0.00   |
| P                              | 3.00                                        | 2.94   | 3.03   | 3.00   | 3.03   | 2.97   | 2.95     | 3.00   | 3.00   | 3.05   |
| Si                             | 0.01                                        | 0.00   | —      | —      | 0.00   | 0.00   | 0.01     | 0.00   | 0.01   | 0.00   |
| S                              | 0.00                                        | 0.01   | 0.00   | —      | 0.00   | —      | 0.01     | 0.00   | 0.00   | 0.00   |
| Mn                             | —                                           | —      | —      | —      | —      | —      | —        | —      | —      | —      |
| F                              | 1.19                                        | 1.15   | 1.10   | 1.16   | 1.01   | 1.05   | 1.01     | 1.10   | 1.04   | 0.99   |
| Cl                             | —                                           | —      | —      | —      | —      | —      | —        | —      | —      | 0.00   |
| Spot No.                       | 09-1                                        | 09-2   | 09-3   | 09-4   | 09-5   | 09-6   | 09-7     | 26-1   | 26-2   | 26-3   |
| SXS15-09                       |                                             |        |        |        |        |        | SXD15-26 |        |        |        |
| CaO                            | 52.52                                       | 51.91  | 52.23  | 54.60  | 53.07  | 53.16  | 53.32    | 54.12  | 53.06  | 52.52  |
| Ce <sub>2</sub> O <sub>3</sub> | 0.08                                        | 0.16   | 0.16   | 0.15   | 0.38   | 0.32   | 0.36     | 0.39   | 0.22   | 0.52   |
| La <sub>2</sub> O <sub>3</sub> | 0.05                                        | 0.01   | 0.10   | 0.12   | 0.14   | 0.10   | 0.20     | 0.11   | 0.03   | 0.24   |
| SrO                            | 1.94                                        | 1.75   | 1.88   | 1.71   | 2.10   | 1.82   | 1.96     | 1.67   | 1.02   | 1.35   |
| BaO                            | b.d.l.                                      | b.d.l. | b.d.l. | b.d.l. | 0.03   | b.d.l. | 0.02     | b.d.l. | 0.04   | b.d.l. |
| Na <sub>2</sub> O              | 0.09                                        | 0.11   | 0.12   | 0.10   | 0.18   | 0.21   | 0.22     | 0.21   | 0.16   | 0.41   |
| Pr <sub>2</sub> O <sub>3</sub> | 0.03                                        | b.d.l. | 0.03   | b.d.l. | 0.01   | 0.02   | 0.10     | 0.02   | b.d.l. | b.d.l. |
| Nd <sub>2</sub> O <sub>3</sub> | 0.10                                        | b.d.l. | b.d.l. | 0.12   | 0.02   | 0.15   | 0.11     | 0.25   | 0.07   | 0.48   |
| P <sub>2</sub> O <sub>5</sub>  | 40.90                                       | 41.59  | 41.45  | 42.60  | 41.48  | 40.58  | 41.34    | 41.95  | 41.43  | 40.67  |
| SiO <sub>2</sub>               | b.d.l.                                      | 0.01   | 0.01   | b.d.l. | b.d.l. | b.d.l. | b.d.l.   | b.d.l. | 0.04   | 0.02   |
| SO <sub>3</sub>                | 0.04                                        | 0.02   | 0.06   | 0.03   | 0.12   | 0.08   | 0.07     | 0.07   | 0.01   | 0.04   |
| MnO                            | b.d.l.                                      | b.d.l. | b.d.l. | b.d.l. | b.d.l. | b.d.l. | b.d.l.   | b.d.l. | b.d.l. | b.d.l. |
| F                              | 3.91                                        | 3.68   | 3.82   | 4.78   | 4.10   | 5.05   | 4.33     | 3.85   | 3.41   | 4.20   |
| Cl                             | b.d.l.                                      | b.d.l. | b.d.l. | b.d.l. | b.d.l. | b.d.l. | b.d.l.   | b.d.l. | b.d.l. | 0.03   |

|                                |                                             |        |        |        |        |        |        |        |       |       |
|--------------------------------|---------------------------------------------|--------|--------|--------|--------|--------|--------|--------|-------|-------|
| O-(F, Cl) <sub>2</sub>         | 1.64                                        | 1.55   | 1.61   | 2.01   | 1.73   | 2.13   | 1.82   | 1.62   | 1.43  | 1.77  |
| total                          | 98.01                                       | 97.70  | 98.25  | 102.20 | 99.91  | 99.38  | 100.21 | 101.03 | 98.04 | 98.71 |
| in apfu                        | Structural formula calculated for 8 cations |        |        |        |        |        |        |        |       |       |
| Ca                             | 4.88                                        | 4.83   | 4.84   | 4.88   | 4.85   | 4.90   | 4.86   | 4.87   | 4.89  | 4.85  |
| Na                             | 0.02                                        | 0.02   | 0.02   | 0.02   | 0.03   | 0.04   | 0.04   | 0.03   | 0.03  | 0.07  |
| Sr                             | 0.10                                        | 0.09   | 0.09   | 0.08   | 0.10   | 0.09   | 0.10   | 0.08   | 0.05  | 0.07  |
| Ba                             | —                                           | —      | —      | —      | 0.00   | —      | 0.00   | —      | 0.00  | —     |
| La                             | 0.00                                        | 0.00   | 0.00   | 0.00   | 0.00   | 0.00   | 0.01   | 0.00   | 0.00  | 0.01  |
| Ce                             | 0.00                                        | 0.01   | 0.01   | 0.00   | 0.01   | 0.01   | 0.01   | 0.01   | 0.01  | 0.02  |
| Pr                             | 0.00                                        | —      | 0.00   | —      | 0.00   | 0.00   | 0.00   | 0.00   | —     | —     |
| Nd                             | 0.00                                        | —      | —      | 0.00   | 0.00   | 0.00   | 0.00   | 0.01   | 0.00  | 0.01  |
| P                              | 3.00                                        | 3.06   | 3.03   | 3.01   | 2.99   | 2.95   | 2.98   | 2.98   | 3.02  | 2.97  |
| Si                             | —                                           | 0.00   | 0.00   | —      | —      | —      | —      | —      | 0.00  | 0.00  |
| S                              | 0.00                                        | 0.00   | 0.00   | 0.00   | 0.01   | 0.01   | 0.00   | 0.00   | 0.00  | 0.00  |
| Mn                             | —                                           | —      | —      | —      | —      | —      | —      | —      | —     | —     |
| F                              | 1.07                                        | 1.01   | 1.04   | 1.26   | 1.10   | 1.37   | 1.17   | 1.02   | 0.93  | 1.14  |
| Cl                             | —                                           | —      | —      | —      | —      | —      | —      | —      | —     | 0.00  |
| Spot No.                       | 26-4                                        | 26-5   | 26-6   | 26-7   | 26-8   | 26-9   | 26-10  |        |       |       |
| SXD15-26                       |                                             |        |        |        |        |        |        |        |       |       |
| CaO                            | 52.26                                       | 52.39  | 54.60  | 53.72  | 53.82  | 54.38  | 53.53  |        |       |       |
| Ce <sub>2</sub> O <sub>3</sub> | 0.26                                        | 0.59   | 0.33   | 0.28   | 0.09   | 0.20   | 0.28   |        |       |       |
| La <sub>2</sub> O <sub>3</sub> | 0.05                                        | 0.24   | 0.21   | 0.10   | 0.13   | 0.11   | 0.06   |        |       |       |
| SrO                            | 0.89                                        | 1.39   | 0.42   | 0.97   | 0.75   | 0.95   | 0.86   |        |       |       |
| BaO                            | b.d.l.                                      | 0.02   | 0.06   | 0.06   | b.d.l. | b.d.l. | 0.05   |        |       |       |
| Na <sub>2</sub> O              | 0.15                                        | 0.38   | 0.26   | 0.16   | 0.12   | 0.09   | 0.17   |        |       |       |
| Pr <sub>2</sub> O <sub>3</sub> | 0.04                                        | 0.04   | b.d.l. | 0.08   | 0.07   | b.d.l. | 0.09   |        |       |       |
| Nd <sub>2</sub> O <sub>3</sub> | 0.13                                        | 0.47   | 0.23   | 0.08   | b.d.l. | 0.12   | 0.11   |        |       |       |
| P <sub>2</sub> O <sub>5</sub>  | 41.42                                       | 41.22  | 40.40  | 41.62  | 41.78  | 42.58  | 42.11  |        |       |       |
| SiO <sub>2</sub>               | 0.01                                        | 0.01   | 0.21   | 0.04   | 0.03   | 0.02   | b.d.l. |        |       |       |
| SO <sub>3</sub>                | b.d.l.                                      | 0.06   | 0.10   | 0.05   | 0.02   | b.d.l. | b.d.l. |        |       |       |
| MnO                            | b.d.l.                                      | b.d.l. | b.d.l. | b.d.l. | b.d.l. | b.d.l. | b.d.l. |        |       |       |
| F                              | 4.14                                        | 3.35   | 4.20   | 3.34   | 3.81   | 3.43   | 3.29   |        |       |       |
| Cl                             | b.d.l.                                      | b.d.l. | b.d.l. | b.d.l. | b.d.l. | b.d.l. | b.d.l. |        |       |       |
| O-(F, Cl) <sub>2</sub>         | 1.74                                        | 1.41   | 1.77   | 1.41   | 1.60   | 1.44   | 1.38   |        |       |       |
| total                          | 97.63                                       | 98.75  | 99.26  | 99.09  | 99.03  | 100.45 | 99.18  |        |       |       |
| in apfu                        | Structural formula calculated for 8 cations |        |        |        |        |        |        |        |       |       |
| Ca                             | 4.87                                        | 4.82   | 4.98   | 4.90   | 4.91   | 4.90   | 4.88   |        |       |       |
| Na                             | 0.03                                        | 0.06   | 0.04   | 0.03   | 0.02   | 0.01   | 0.03   |        |       |       |
| Sr                             | 0.05                                        | 0.07   | 0.02   | 0.05   | 0.04   | 0.05   | 0.04   |        |       |       |
| Ba                             | —                                           | 0.00   | 0.00   | 0.00   | —      | —      | 0.00   |        |       |       |
| La                             | 0.00                                        | 0.01   | 0.01   | 0.00   | 0.00   | 0.00   | 0.00   |        |       |       |
| Ce                             | 0.01                                        | 0.02   | 0.01   | 0.01   | 0.00   | 0.01   | 0.01   |        |       |       |

|    |      |      |      |      |      |      |      |
|----|------|------|------|------|------|------|------|
| Pr | 0.00 | 0.00 | —    | 0.00 | 0.00 | —    | 0.00 |
| Nd | 0.00 | 0.01 | 0.01 | 0.00 | —    | 0.00 | 0.00 |
| P  | 3.05 | 3.00 | 2.91 | 3.00 | 3.01 | 3.03 | 3.03 |
| Si | 0.00 | 0.00 | 0.02 | 0.00 | 0.00 | 0.00 | —    |
| S  | —    | 0.00 | 0.01 | 0.00 | 0.00 | —    | —    |
| Mn | —    | —    | —    | —    | —    | —    | —    |
| F  | 1.14 | 0.91 | 1.13 | 0.90 | 1.03 | 0.91 | 0.88 |
| Cl | —    | —    | —    | —    | —    | —    | —    |

---

**Table S2.** Major element composition of apatite in Shaxiongdong syenite.

| Spot No.                       | 08-1                                        | 08-2   | 08-3   | 08-4   | 08-5            | 08-6   | 08-7   | 08-8   | 10-1   |
|--------------------------------|---------------------------------------------|--------|--------|--------|-----------------|--------|--------|--------|--------|
| <b>SXD15-08</b>                |                                             |        |        |        | <b>SXD15-10</b> |        |        |        |        |
| CaO                            | 51.80                                       | 51.61  | 53.08  | 52.16  | 51.51           | 51.23  | 51.21  | 49.94  | 51.38  |
| Ce <sub>2</sub> O <sub>3</sub> | 0.31                                        | 0.73   | 0.32   | 0.46   | 0.45            | 0.60   | 0.89   | 1.07   | 0.39   |
| La <sub>2</sub> O <sub>3</sub> | 0.08                                        | 0.37   | 0.12   | 0.25   | 0.13            | 0.38   | 0.35   | 0.39   | 0.16   |
| SrO                            | 1.85                                        | 1.80   | 1.68   | 1.84   | 1.83            | 2.23   | 1.99   | 1.86   | 1.76   |
| BaO                            | b.d.l.                                      | b.d.l. | b.d.l. | 0.02   | 0.01            | b.d.l. | b.d.l. | 0.02   | b.d.l. |
| Na <sub>2</sub> O              | 0.25                                        | 0.47   | 0.23   | 0.34   | 0.30            | 0.38   | 0.46   | 0.55   | 0.22   |
| Pr <sub>2</sub> O <sub>3</sub> | b.d.l.                                      | 0.11   | b.d.l. | 0.03   | 0.07            | 0.04   | 0.11   | 0.05   | 0.05   |
| Nd <sub>2</sub> O <sub>3</sub> | 0.20                                        | 0.37   | 0.10   | 0.30   | 0.31            | 0.27   | 0.41   | 0.41   | 0.09   |
| P <sub>2</sub> O <sub>5</sub>  | 40.59                                       | 40.98  | 40.47  | 41.06  | 41.91           | 41.22  | 40.94  | 41.91  | 41.73  |
| SiO <sub>2</sub>               | 0.03                                        | 0.02   | b.d.l. | 0.02   | 0.02            | b.d.l. | b.d.l. | b.d.l. | 0.02   |
| SO <sub>3</sub>                | 0.10                                        | 0.06   | 0.06   | 0.07   | 0.10            | 0.13   | 0.05   | 0.06   | 0.12   |
| MnO                            | b.d.l.                                      | b.d.l. | b.d.l. | b.d.l. | b.d.l.          | b.d.l. | b.d.l. | b.d.l. | b.d.l. |
| F                              | 3.64                                        | 3.71   | 4.48   | 4.95   | 3.76            | 4.15   | 3.87   | 3.88   | 3.48   |
| Cl                             | b.d.l.                                      | b.d.l. | b.d.l. | b.d.l. | b.d.l.          | 0.01   | b.d.l. | 0.02   | b.d.l. |
| O-(F, Cl) <sub>2</sub>         | 1.53                                        | 1.56   | 1.89   | 2.08   | 1.58            | 1.75   | 1.63   | 1.64   | 1.47   |
| total                          | 97.32                                       | 98.67  | 98.64  | 99.41  | 98.82           | 98.89  | 98.63  | 98.52  | 97.94  |
| in apfu                        | Structural formula calculated for 8 cations |        |        |        |                 |        |        |        |        |
| Ca                             | 4.84                                        | 4.78   | 4.90   | 4.82   | 4.76            | 4.75   | 4.76   | 4.66   | 4.78   |
| Na                             | 0.04                                        | 0.08   | 0.04   | 0.06   | 0.05            | 0.06   | 0.08   | 0.09   | 0.04   |
| Sr                             | 0.09                                        | 0.09   | 0.08   | 0.09   | 0.09            | 0.11   | 0.10   | 0.09   | 0.09   |
| Ba                             | —                                           | —      | —      | 0.00   | 0.00            | —      | —      | 0.00   | —      |
| La                             | 0.00                                        | 0.01   | 0.00   | 0.01   | 0.00            | 0.01   | 0.01   | 0.01   | 0.01   |
| Ce                             | 0.01                                        | 0.02   | 0.01   | 0.01   | 0.01            | 0.02   | 0.03   | 0.03   | 0.01   |
| Pr                             | —                                           | 0.00   | —      | 0.00   | 0.00            | 0.00   | 0.00   | 0.00   | 0.00   |
| Nd                             | 0.01                                        | 0.01   | 0.00   | 0.01   | 0.01            | 0.01   | 0.01   | 0.01   | 0.00   |
| P                              | 3.00                                        | 3.00   | 2.95   | 3.00   | 3.06            | 3.02   | 3.01   | 3.09   | 3.07   |
| Si                             | 0.00                                        | 0.00   | —      | 0.00   | 0.00            | —      | —      | —      | 0.00   |
| S                              | 0.01                                        | 0.00   | 0.00   | 0.00   | 0.01            | 0.01   | 0.00   | 0.00   | 0.01   |
| Mn                             | —                                           | —      | —      | —      | —               | —      | —      | —      | —      |
| F                              | 1.00                                        | 1.01   | 1.22   | 1.35   | 1.02            | 1.14   | 1.06   | 1.07   | 0.96   |
| Cl                             | —                                           | —      | —      | —      | —               | 0.00   | —      | 0.00   | —      |
| Spot No.                       | 10-2                                        | 10-3   | 10-4   | 10-5   | 10-6            | 10-7   | 10-8   | 10-9   |        |
| <b>SXD15-10</b>                |                                             |        |        |        |                 |        |        |        |        |
| CaO                            | 52.84                                       | 52.77  | 52.97  | 52.28  | 51.95           | 52.39  | 52.43  | 52.57  | 52.89  |
| Ce <sub>2</sub> O <sub>3</sub> | 0.19                                        | 0.21   | 0.25   | 0.20   | 0.69            | 0.32   | 0.25   | 0.26   | 0.20   |
| La <sub>2</sub> O <sub>3</sub> | 0.01                                        | 0.12   | 0.12   | 0.04   | 0.29            | 0.13   | 0.07   | 0.14   | 0.08   |

|                                |                                             |        |        |        |        |        |        |        |        |
|--------------------------------|---------------------------------------------|--------|--------|--------|--------|--------|--------|--------|--------|
| SrO                            | 1.69                                        | 1.53   | 1.54   | 1.51   | 1.64   | 1.76   | 1.64   | 1.54   | 1.60   |
| BaO                            | b.d.l.                                      | b.d.l. | 0.02   | b.d.l. | b.d.l. | 0.03   | 0.06   | b.d.l. | b.d.l. |
| Na <sub>2</sub> O              | 0.22                                        | 0.15   | 0.19   | 0.15   | 0.34   | 0.30   | 0.17   | 0.17   | 0.16   |
| Pr <sub>2</sub> O <sub>3</sub> | b.d.l.                                      | 0.02   | b.d.l. | b.d.l. | 0.05   | 0.04   | 0.01   | b.d.l. | b.d.l. |
| Nd <sub>2</sub> O <sub>3</sub> | 0.05                                        | 0.05   | b.d.l. | b.d.l. | 0.26   | 0.10   | 0.15   | 0.05   | 0.08   |
| P <sub>2</sub> O <sub>5</sub>  | 41.21                                       | 41.54  | 41.87  | 41.89  | 41.52  | 41.48  | 42.12  | 41.53  | 42.09  |
| SiO <sub>2</sub>               | b.d.l.                                      | 0.02   | 0.01   | 0.02   | b.d.l. | 0.02   | b.d.l. | b.d.l. | 0.01   |
| SO <sub>3</sub>                | 0.06                                        | 0.06   | 0.09   | 0.12   | 0.12   | 0.08   | 0.04   | 0.05   | 0.07   |
| MnO                            | b.d.l.                                      | b.d.l. | b.d.l. | b.d.l. | b.d.l. | b.d.l. | b.d.l. | b.d.l. | b.d.l. |
| F                              | 3.72                                        | 3.65   | 3.91   | 3.63   | 3.67   | 4.14   | 3.65   | 3.63   | 3.56   |
| Cl                             | b.d.l.                                      | b.d.l. | b.d.l. | 0.01   | b.d.l. | b.d.l. | 0.02   | 0.01   | b.d.l. |
| O-(F, Cl) <sub>2</sub>         | 1.57                                        | 1.54   | 1.64   | 1.53   | 1.55   | 1.74   | 1.54   | 1.53   | 1.50   |
| total                          | 98.44                                       | 98.58  | 99.32  | 98.32  | 98.98  | 99.05  | 99.06  | 98.40  | 99.25  |
| in apfu                        | Structural formula calculated for 8 cations |        |        |        |        |        |        |        |        |
| Ca                             | 4.87                                        | 4.86   | 4.85   | 4.83   | 4.79   | 4.82   | 4.81   | 4.85   | 4.84   |
| Na                             | 0.04                                        | 0.02   | 0.03   | 0.02   | 0.06   | 0.05   | 0.03   | 0.03   | 0.03   |
| Sr                             | 0.08                                        | 0.08   | 0.08   | 0.08   | 0.08   | 0.09   | 0.08   | 0.08   | 0.08   |
| Ba                             | —                                           | —      | 0.00   | —      | —      | 0.00   | 0.00   | —      | —      |
| La                             | 0.00                                        | 0.00   | 0.00   | 0.00   | 0.01   | 0.00   | 0.00   | 0.00   | 0.00   |
| Ce                             | 0.01                                        | 0.01   | 0.01   | 0.01   | 0.02   | 0.01   | 0.01   | 0.01   | 0.01   |
| Pr                             | —                                           | 0.00   | —      | —      | 0.00   | 0.00   | 0.00   | —      | —      |
| Nd                             | 0.00                                        | 0.00   | —      | —      | 0.01   | 0.00   | 0.00   | 0.00   | 0.00   |
| P                              | 3.00                                        | 3.02   | 3.03   | 3.06   | 3.02   | 3.02   | 3.06   | 3.03   | 3.04   |
| Si                             | —                                           | 0.00   | 0.00   | 0.00   | —      | 0.00   | —      | —      | 0.00   |
| S                              | 0.00                                        | 0.00   | 0.01   | 0.01   | 0.01   | 0.00   | 0.00   | 0.00   | 0.00   |
| Mn                             | —                                           | —      | —      | —      | —      | —      | —      | —      | —      |
| F                              | 1.01                                        | 0.99   | 1.05   | 0.99   | 1.00   | 1.12   | 0.99   | 0.99   | 0.96   |
| Cl                             | —                                           | —      | —      | 0.00   | —      | —      | 0.00   | 0.00   | —      |

**Table S3.** Major element composition of apatite in Shaxiongdong hornblendite.

| Spot No.                       | 21-1                                        | 21-2   | 21-3   | 21-4   | 21-5   | 21-6   | 21-7   | 21-8   | 21-9   | 21-10  |
|--------------------------------|---------------------------------------------|--------|--------|--------|--------|--------|--------|--------|--------|--------|
| <b>SXD15-21</b>                |                                             |        |        |        |        |        |        |        |        |        |
| CaO                            | 56.33                                       | 56.95  | 55.71  | 55.56  | 55.34  | 56.17  | 55.29  | 55.47  | 55.96  | 55.04  |
| Ce <sub>2</sub> O <sub>3</sub> | 0.16                                        | 0.07   | 0.03   | 0.09   | 0.15   | 0.10   | 0.07   | b.d.l. | 0.14   | 0.08   |
| La <sub>2</sub> O <sub>3</sub> | 0.10                                        | 0.07   | b.d.l. | b.d.l. | 0.10   | 0.10   | 0.11   | b.d.l. | 0.04   | 0.09   |
| SrO                            | b.d.l.                                      | b.d.l. | b.d.l. | b.d.l. | b.d.l. | b.d.l. | b.d.l. | b.d.l. | b.d.l. | b.d.l. |
| BaO                            | b.d.l.                                      | 0.01   | b.d.l. | b.d.l. | 0.08   | 0.02   | b.d.l. | b.d.l. | b.d.l. | b.d.l. |
| Na <sub>2</sub> O              | 0.11                                        | 0.03   | 0.11   | 0.09   | 0.12   | 0.17   | 0.10   | 0.07   | 0.17   | 0.14   |
| Pr <sub>2</sub> O <sub>3</sub> | b.d.l.                                      | 0.09   | 0.10   | b.d.l. | 0.03   | b.d.l. | b.d.l. | b.d.l. | b.d.l. | 0.13   |
| Nd <sub>2</sub> O <sub>3</sub> | 0.02                                        | b.d.l. | b.d.l. | b.d.l. | b.d.l. | b.d.l. | 0.06   | b.d.l. | b.d.l. | b.d.l. |
| P <sub>2</sub> O <sub>5</sub>  | 42.68                                       | 42.74  | 42.58  | 41.41  | 41.47  | 41.08  | 41.48  | 41.80  | 41.32  | 39.83  |
| SiO <sub>2</sub>               | 0.16                                        | 0.13   | 0.11   | 0.12   | 0.30   | 0.28   | 0.18   | 0.07   | 0.40   | 0.21   |
| SO <sub>3</sub>                | 0.09                                        | 0.12   | 0.21   | 0.11   | 0.52   | 0.46   | 0.20   | 0.13   | 0.52   | 0.36   |
| MnO                            | b.d.l.                                      | b.d.l. | b.d.l. | b.d.l. | b.d.l. | b.d.l. | b.d.l. | b.d.l. | b.d.l. | b.d.l. |
| F                              | 2.97                                        | 3.47   | 4.04   | 3.76   | 3.69   | 3.70   | 3.20   | 3.42   | 3.02   | 2.91   |
| Cl                             | 0.06                                        | b.d.l. | b.d.l. | 0.01   | b.d.l. | b.d.l. | b.d.l. | b.d.l. | b.d.l. | 0.02   |
| O-(F, Cl) <sub>2</sub>         | 1.26                                        | 1.46   | 1.70   | 1.59   | 1.55   | 1.56   | 1.35   | 1.44   | 1.28   | 1.23   |
| total                          | 101.41                                      | 102.22 | 101.18 | 99.58  | 100.25 | 100.53 | 99.34  | 99.54  | 100.31 | 97.59  |
| in apfu                        | Structural formula calculated for 8 cations |        |        |        |        |        |        |        |        |        |
| Ca                             | 4.98                                        | 5.00   | 4.96   | 5.01   | 4.97   | 5.02   | 4.99   | 5.00   | 4.99   | 5.04   |
| Na                             | 0.02                                        | 0.01   | 0.02   | 0.02   | 0.02   | 0.03   | 0.02   | 0.01   | 0.03   | 0.02   |
| Sr                             | —                                           | —      | —      | —      | —      | —      | —      | —      | —      | —      |
| Ba                             | —                                           | 0.00   | —      | —      | 0.00   | 0.00   | —      | —      | —      | —      |
| La                             | 0.00                                        | 0.00   | —      | —      | 0.00   | 0.00   | 0.00   | —      | 0.00   | 0.00   |
| Ce                             | 0.00                                        | 0.00   | 0.00   | 0.00   | 0.00   | 0.00   | 0.00   | 0.00   | 0.00   | 0.00   |
| Pr                             | —                                           | 0.00   | 0.00   | —      | 0.00   | —      | —      | —      | —      | 0.00   |
| Nd                             | 0.00                                        | —      | —      | —      | —      | —      | 0.00   | —      | —      | —      |
| P                              | 2.98                                        | 2.97   | 3.00   | 2.95   | 2.94   | 2.90   | 2.96   | 2.98   | 2.91   | 2.88   |
| Si                             | 0.01                                        | 0.01   | 0.01   | 0.01   | 0.03   | 0.02   | 0.01   | 0.01   | 0.03   | 0.02   |
| S                              | 0.01                                        | 0.01   | 0.01   | 0.01   | 0.03   | 0.03   | 0.01   | 0.01   | 0.03   | 0.02   |
| Mn                             | —                                           | —      | —      | —      | —      | —      | —      | —      | —      | —      |
| F                              | 0.77                                        | 0.90   | 1.06   | 1.00   | 0.98   | 0.98   | 0.85   | 0.91   | 0.80   | 0.79   |
| Cl                             | 0.01                                        | —      | —      | 0.00   | —      | —      | —      | —      | —      | 0.00   |
